# Supplementary material for: Heart Rate Variability in Women with Systemic Lupus Erythematosus: Association with Health-Related Parameters and Effects of Aerobic Exercise
Source: PubMed Central journal article supplement (PMC7766283; doi:10.3390/ijerph17249501), 2020-12-18
Supplement: ijerph-17-09501-s001.pdf [file ijerph-17-09501-s001.pdf]

**Table S1.** Spearman’s correlations between HRV derived parameters, inflammatory markers, and PROs (N= 55).

|       |           | hsCRP            | IL-6                | TNF -<br>α          | MPO                 | SLEDAI           | SDI                 | PSS                 | BDI                 | MFI-<br>General<br>Fatigue | MFI-<br>Physical<br>Fatigue | MFI-<br>Reduce<br>Activity | MFI-Reduce<br>Motivation | MFI-<br>Mental<br>Fatigue | SF-36<br>Physical<br>Component | SF-36 Mental<br>Component |
|-------|-----------|------------------|---------------------|---------------------|---------------------|------------------|---------------------|---------------------|---------------------|----------------------------|-----------------------------|----------------------------|--------------------------|---------------------------|--------------------------------|---------------------------|
| SDNN  | $r_s$     | -0.05            | -0.11               | -0.21               | 0.04                | -0.21            | -0.14               | 0.16                | -0.11               | 0.05                       | -0.14                       | -0.10                      | -0.08                    | -0.06                     | -0.03                          | -0.01                     |
|       | 95%<br>CI | -0.32<br>to 0.21 | -0.37<br>to<br>0.16 | -0.45<br>to<br>0.05 | -0.23<br>to<br>0.30 | -0.45 to<br>0.06 | -0.39<br>to<br>0.13 | -0.11<br>to<br>0.41 | -0.37<br>to<br>0.16 | -0.21 to<br>0.32           | -0.39 to<br>0.13            | -0.36 to<br>0.17           | -0.34 to 0.19            | -0.32 to<br>0.21          | -0.31 to 0.27                  | -0.30 to 0.28             |
|       | $p$       | 0.69             | 0.41                | 0.12                | 0.76                | 0.13             | 0.32                | 0.24                | 0.42                | 0.69                       | 0.32                        | 0.46                       | 0.56                     | 0.68                      | 0.87                           | 0.96                      |
| RMSDD | $r_s$     | -0.09            | -0.14               | -0.17               | -0.01               | -0.19            | -0.03               | 0.04                | -0.04               | 0.06                       | -0.09                       | 0.03                       | 0.03                     | 0.04                      | 0.05                           | -0.05                     |
|       | 95%<br>CI | -0.35<br>to 0.18 | -0.39<br>to<br>0.13 | -0.42<br>to<br>0.10 | -0.28<br>to<br>0.25 | -0.43 to<br>0.08 | -0.29<br>to<br>0.24 | -0.23<br>to<br>0.30 | -0.31<br>to<br>0.22 | -0.20 to<br>0.32           | -0.34 to<br>0.18            | -0.24 to<br>0.29           | -0.24 to 0.29            | -0.23 to<br>0.30          | -0.25 to 0.33                  | -0.34 to 0.24             |
|       | $p$       | 0.52             | 0.30                | 0.21                | 0.93                | 0.17             | 0.82                | 0.78                | 0.75                | 0.64                       | 0.53                        | 0.83                       | 0.83                     | 0.79                      | 0.75                           | 0.73                      |
| pNN50 | $r_s$     | -0.06            | -0.14               | -0.17               | 0.05                | -0.09            | -0.06               | 0.16                | -0.06               | 0.10                       | -0.09                       | 0.05                       | -0.02                    | 0.04                      | 0.07                           | -0.04                     |
|       | 95%<br>CI | -0.32<br>to 0.21 | -0.39<br>to<br>0.13 | -0.42<br>to<br>0.10 | -0.22<br>to<br>0.31 | -0.43 to<br>0.08 | -0.32<br>to<br>0.21 | -0.11<br>to<br>0.41 | -0.32<br>to<br>0.21 | -0.17 to<br>0.36           | -0.34 to<br>0.18            | -0.22 to<br>0.31           | -0.28 to 0.25            | -0.23 to<br>0.30          | -0.22 to 0.35                  | -0.32 to 0.26             |
|       | $p$       | 0.66             | 0.31                | 0.21                | 0.71                | 0.17             | 0.66                | 0.24                | 0.66                | 0.47                       | 0.53                        | 0.72                       | 0.90                     | 0.78                      | 0.64                           | 0.81                      |
| LF    | $r_s$     | -0.03            | -0.08               | -0.23               | 0.06                | -0.16            | -0.17               | 0.17                | -0.13               | 0.10                       | -0.08                       | -0.10                      | -0.13                    | -0.05                     | -0.03                          | 0.01                      |
|       | 95%<br>CI | -0.30<br>to 0.23 | -0.34<br>to<br>0.19 | -0.46<br>to<br>0.04 | -0.21<br>to<br>0.32 | -0.41 to<br>0.11 | -0.42<br>to<br>0.10 | -0.10<br>to<br>0.42 | -0.38<br>to<br>0.14 | -0.17 to<br>0.36           | -0.33 to<br>0.19            | -0.35 to<br>0.17           | -0.38 to 0.14            | -0.31 to<br>0.22          | -0.32 to 0.26                  | -0.28 to 0.30             |
|       | $p$       | 0.81             | 0.56                | 0.10                | 0.66                | 0.24             | 0.21                | 0.20                | 0.35                | 0.45                       | 0.58                        | 0.49                       | 0.35                     | 0.71                      | 0.84                           | 0.95                      |
| HF    | $r_s$     | -0.07            | -0.20               | -0.23               | -0.08               | -0.26            | -0.15               | 0.05                | -0.14               | -0.05                      | -0.25                       | -0.13                      | -0.13                    | -0.03                     | 0.03                           | -0.07                     |
|       | 95%<br>CI | -0.33<br>to 0.20 | -0.44<br>to<br>0.07 | -0.47<br>to<br>0.03 | -0.34<br>to<br>0.19 | -0.52 to<br>0.03 | -0.40<br>to<br>0.12 | -0.21<br>to<br>0.31 | -0.39<br>to<br>0.13 | -0.31 to<br>0.22           | -0.49 to<br>0.01            | -0.38 to<br>0.14           | -0.38 to 0.14            | -0.29 to<br>0.24          | -0.27 to 0.31                  | -0.12 to 0.44             |
|       | $p$       | 0.60             | 0.15                | 0.09                | 0.58                | 0.06             | 0.28                | 0.70                | 0.31                | 0.72                       | 0.06                        | 0.34                       | 0.34                     | 0.86                      | 0.86                           | 0.25                      |
| LFHF  | $r_s$     | 0.05             | 0.32*               | 0.17                | 0.20                | 0.17             | 0.03                | 0.08                | 0.12                | 0.14                       | 0.30*                       | 0.10                       | -0.03                    | -0.05                     | -0.11                          | 0.17                      |
|       | 95%<br>CI | -0.21<br>to 0.31 | 0.06<br>to<br>0.54  | -0.10<br>to<br>0.42 | -0.07<br>to<br>0.44 | -0.10 to<br>0.42 | -0.24<br>to<br>0.29 | -0.19<br>to<br>0.34 | -0.15<br>to<br>0.37 | -0.13 to<br>0.39           | 0.04 to<br>0.52             | -0.17 to<br>0.35           | -0.29 to 0.24            | -0.31 to<br>0.22          | -0.39 to 0.18                  | -0.12 to 0.44             |
|       | $p$       | 0.70             | 0.02                | 0.21                | 0.15                | 0.22             | 0.84                | 0.55                | 0.38                | 0.32                       | 0.03                        | 0.48                       | 0.84                     | 0.70                      | 0.46                           | 0.25                      |
| SD1   | $r_s$     | -0.09            | -0.14               | -0.17               | -0.01               | -0.19            | -0.03               | 0.04                | -0.04               | 0.06                       | 0.03                        | 0.03                       | 0.03                     | 0.04                      | 0.05                           | -0.05                     |

|        |                      |                   |                  |                  |                  |                  |                  |                  |                  |                  |                  |                  |               |                  |               |               |
|--------|----------------------|-------------------|------------------|------------------|------------------|------------------|------------------|------------------|------------------|------------------|------------------|------------------|---------------|------------------|---------------|---------------|
|        | 95%<br>CI            | -0.35<br>to 0.18  | -0.39<br>to 0.13 | -0.42<br>to 0.10 | -0.28<br>to 0.25 | -0.43 to<br>0.08 | -0.29<br>to 0.24 | -0.23<br>to 0.30 | -0.31<br>to 0.22 | -0.20 to<br>0.32 | -0.24 to<br>0.29 | -0.24 to<br>0.29 | -0.24 to 0.29 | -0.23 to<br>0.30 | -0.25 to 0.33 | -0.34 to 0.24 |
|        | <i>p</i>             | 0.52              | 0.30             | 0.21             | 0.93             | 0.17             | 0.82             | 0.78             | 0.75             | 0.64             | 0.83             | 0.83             | 0.83          | 0.79             | 0.75          | 0.73          |
| SD2    | <i>r<sub>s</sub></i> | -0.03             | -0.09            | -0.21            | 0.09             | -0.20            | -0.17            | 0.18             | -0.14            | 0.06             | -0.14            | -0.15            | -0.12         | -0.09            | -0.05         | 0.00          |
|        | 95%<br>CI            | -0.29<br>to 0.24  | -0.34<br>to 0.13 | -0.45<br>to 0.06 | -0.18<br>to 0.25 | -0.44 to<br>0.07 | -0.41<br>to 0.10 | -0.09<br>to 0.42 | -0.39<br>to 0.13 | -0.20 to<br>0.32 | -0.39 to<br>0.13 | -0.40 to<br>0.12 | -0.37 to 0.15 | -0.34 to<br>0.18 | -0.34 to 0.24 | -0.29 to 0.29 |
|        | <i>p</i>             | 0.85              | 0.53             | 0.13             | 0.53             | 0.14             | 0.22             | 0.20             | 0.32             | 0.64             | 0.31             | 0.29             | 0.38          | 0.53             | 0.73          | 0.98          |
| SampEn | <i>r<sub>s</sub></i> | -0.35**           | -0.16            | -0.16            | -0.32*           | -0.03            | 0.05             | -0.19            | 0.15             | 0.05             | 0.04             | 0.20             | 0.20          | 0.23             | 0.24          | 0.14          |
|        | 95%<br>CI            | -0.56<br>to -0.10 | -0.41<br>to 0.11 | -0.18<br>to 0.34 | -0.54<br>to 0.06 | -0.29 to<br>0.24 | -0.22<br>to 0.31 | -0.44<br>to 0.08 | -0.12<br>to 0.40 | -0.22 to<br>0.31 | -0.23 to<br>0.30 | -0.07 to<br>0.44 | -0.07 to 0.44 | -0.04 to<br>0.47 | -0.06 to 0.48 | -0.15 to 0.42 |
|        | <i>p</i>             | 0.01              | 0.25             | 0.53             | 0.02             | 0.84             | 0.71             | 0.16             | 0.28             | 0.73             | 0.79             | 0.15             | 0.14          | 0.09             | 0.05          | 0.35          |

Notes: \* $p < 0.05$ ; \*\* $p < 0.01$ .

$r_s$ , spearman's rho; 95% CI, confidence intervals; BDI, Beck depression inventory; HF, high frequency power; hsCRP, high sensitivity C-reactive protein; IL-6, interleukin-6; LF, low frequency power; MFI, multidimension fatigue inventory; MPO, myeloperoxidase; pNN50, percentage of successive normal sinus RR intervals more than 50 ms; PSS, perceived stress scale; RMSSD, root mean square successive difference; SampEn, sample entropy; ms, milliseconds; SD1, standard deviation – poincaré plot crosswise; SD2, standard deviation – poincaré plot lengthwise; SDI, systemic damage index; SDNN, standard deviation of NN intervals; SF-36, short form health survey; SLEDAI, systemic lupus erythematosus disease activity index; TNF- $\alpha$ , tumor necrosis factor alpha.

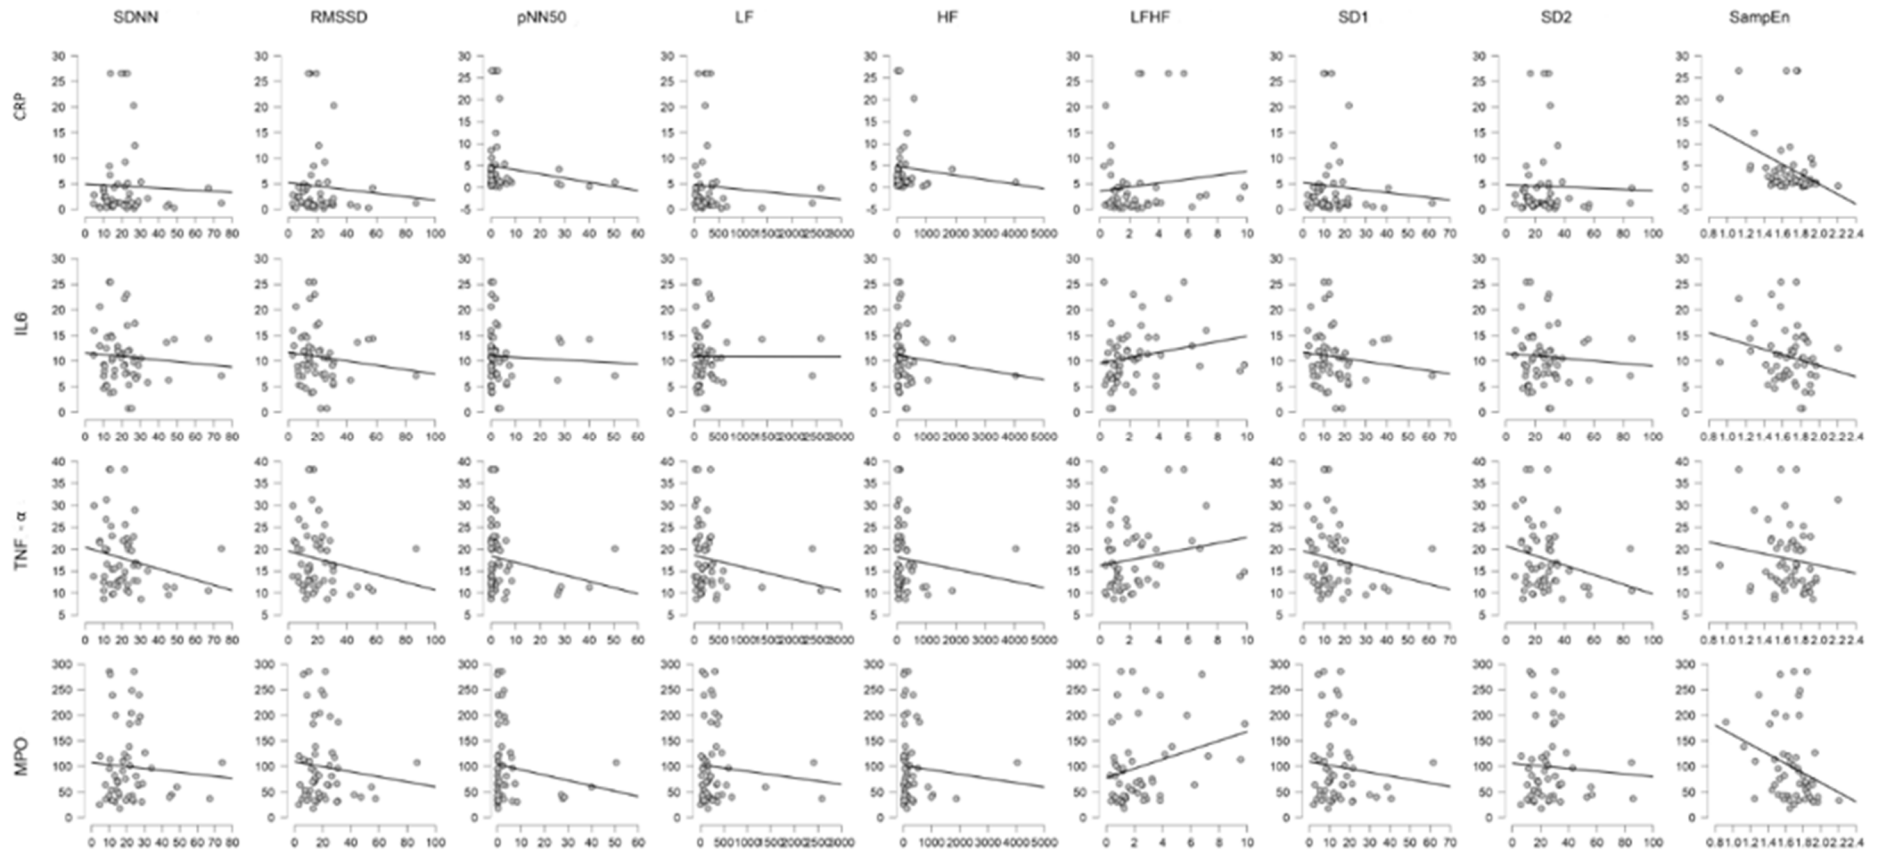

**Figure S1.** Correlations between HRV derived parameters and inflammatory markers (N=55).

**Table S2.** Sensitivity analyses assessing the effects of 12-week progressive aerobic exercise on HRV derived parameters in women with systemic lupus erythematosus (participants in the exercise group were included if attendance  $\geq 90\%$ ).

| Change from baseline at<br>Week 12 | Exercise (n = 18) | Control (n = 23) | <b>Median Difference (95% CI)</b> | <b>p</b> |
|------------------------------------|-------------------|------------------|-----------------------------------|----------|
|                                    | Median (SE)       | Median (SE)      |                                   |          |
| SDNN                               | 5.00 (2.64)       | 4.18 (2.91)      | 0.82 (-11.08 to 8.20)             | 0.763    |
| RMSSD                              | 3.67 (4.04)       | 2.75 (4.33)      | 0.92 (-14.51 to 12.00)            | 0.849    |
| pNN50                              | 0.47 (2.19)       | 0.28 (2.96)      | 0.19 (-7.93 to 7.78)              | 0.984    |
| LF (ms)                            | 2.52 (95.49)      | -22.31 (57.00)   | 24.83 (-277.80 to 153.10)         | 0.561    |
| HF (ms)                            | 10.71 (115.16)    | 6.91 (73.40)     | 3.80 (-232.84 to 163.18)          | 0.723    |
| LFHF                               | -0.01 (1.47)      | 0.05 (1.01)      | -0.06 (-1.55 to 2.39)             | 0.670    |
| SD1                                | 2.60 (2.86)       | 1.95 (3.07)      | 0.65 (-10.27 to 8.50)             | 0.850    |
| SD2                                | 4.11 (2.77)       | 5.22 (3.04)      | -1.11 (-12.49 to 6.80)            | 0.554    |
| SampEn                             | 0.02 (0.08)       | 0.01 (0.08)      | 0.01 (-0.25 to 0.37)              | 0.675    |

The analyses were adjusted for baseline values, mean heart rate and age. Values are the median (standard error). SDNN, standard deviation of NN intervals; RMSSD, root mean square successive difference; pNN50, percentage of successive normal sinus RR intervals more than 50 ms; LF, low frequency power in absolute value; HF, high frequency power in absolute value; LF/HF, ratio low/high frequency; SD1, standard deviation – poincaré plot crosswise; SD2, standard deviation – poincaré plot lengthwise. SampEn, sample entropy; ms, milliseconds; bpm, beats per minute

**Table S3.** Sensitivity analyses using baseline-observation carried forward imputation assessing the effects of 12-week progressive aerobic exercise on HRV derived parameters in women with systemic lupus erythematosus.

| Change from baseline at<br>Week 12 | Exercise (n = 26) | Control (n = 29) | <i>Mean Difference (95% CI)</i> | <i>p</i> |
|------------------------------------|-------------------|------------------|---------------------------------|----------|
|                                    | Median (SE)       | Median (SE)      |                                 |          |
| SDNN                               | 3.79 (2.00)       | 0.00 (2.30)      | 3.79 (-11.59 to 3.27)           | 0.266    |
| RMSSD                              | 4.70 (2.97)       | 0.00 (3.44)      | 4.70 (-10.35 to 8.84)           | 0.875    |
| pNN50                              | 0.40 (1.75)       | 0.00 (2.34)      | 0.40 (-3.39 to 2.00)            | 0.607    |
| LF (ms)                            | 9.19 (68.53)      | 0.00 (45.05)     | 9.19 (-145.40 to 109.40)        | 0.778    |
| HF (ms)                            | 10.71 (81.25)     | 0.00 (57.95)     | 10.71 (-137.69 to 119.44)       | 0.887    |
| LFHF                               | 0.08 (1.04)       | 0.00 (0.81)      | 0.08 (-0.78 to 1.61)            | 0.491    |
| SD1                                | 3.33 (2.10)       | 0.00 (2.43)      | 3.33 (-7.33 to 6.26)            | 0.875    |
| SD2                                | 3.30 (2.14)       | 0.00 (2.40)      | 3.30 (-10.53 to 2.68)           | 0.238    |
| SampEn                             | 0.02 (0.06)       | 0.00 (0.06)      | 0.02 (-0.19 to 0.22)            | 0.883    |

The analyses were adjusted for baseline values, mean heart rate and age. Values are the median (standard error). SDNN, standard deviation of NN intervals; RMSSD, root mean square successive difference; pNN50, percentage of successive normal sinus RR intervals more than 50 ms; LF, low frequency power in absolute value; HF, high frequency power in absolute value; LF/HF, ratio low/high frequency; SD1, standard deviation – poincaré plot crosswise; SD2, standard deviation – poincaré plot lengthwise. SampEn, sample entropy; ms, milliseconds; bpm, beats per minute
